# Supplementary material for: Adaptive selection of diurnal minimum variation: a statistical strategy to obtain representative atmospheric CO 2 data and its application to European elevated mountain stations
Source: Copernicus journal article supplement (doi:10.5194/amt-11-1501-2018), 2018-03-15
Supplement: Supplementary file 1 [file amt-11-1501-2018-supplement.pdf]

Supplement of Atmos. Meas. Tech., 11, 1501–1514, 2018  
<https://doi.org/10.5194/amt-11-1501-2018-supplement>  
© Author(s) 2018. This work is distributed under  
the Creative Commons Attribution 4.0 License.

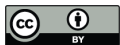

*Supplement of*

**Adaptive selection of diurnal minimum variation: a statistical strategy to obtain representative atmospheric CO<sub>2</sub> data and its application to European elevated mountain stations**

**Ye Yuan et al.**

*Correspondence to:* Ye Yuan (yuan@wzw.tum.de)

The copyright of individual parts of the supplement might differ from the CC BY 4.0 License.

## S1 Applicability of ADVS

### S1.1 Running frequency

We compared the ADVS derived *start time windows* of overall running frequency with seasonal running frequency at all measurement sites except for *HPB*, shown in Table S1.1.

**Table S1.1: *Start time windows* by overall frequency and seasonal frequency (data of whole period), hours in advance and delayed are listed in brackets.**

| Frequency | <i>SSL</i>                 | <i>IZO</i>                  | <i>ZSF</i>                 | <i>SNB</i>                  | <i>JFJ</i>                  |
|-----------|----------------------------|-----------------------------|----------------------------|-----------------------------|-----------------------------|
| Overall   | 0 a.m. – 5 a.m.            | 1 a.m. – 6 a.m.             | 10 p.m. – 3 a.m.           | 3 a.m. – 8 a.m.             | 11 p.m. – 4 a.m.            |
| Winter    | 0 a.m. – 5 a.m.<br>(0 hr)  | 2 a.m. – 7 a.m.<br>(+1 hr)  | 1 a.m. – 6 a.m.<br>(+3 hr) | 6 p.m. – 11 p.m.<br>(-9 hr) | 3 a.m. – 8 a.m.<br>(+4 hr)  |
| Spring    | 0 a.m. – 5 a.m.<br>(0 hr)  | 11 p.m. – 4 a.m.<br>(-2 hr) | 10 p.m. – 3 a.m.<br>(0 hr) | 5 a.m. – 10 a.m.<br>(+2 hr) | 6 p.m. – 11 p.m.<br>(-5 hr) |
| Summer    | 0 a.m. – 5 a.m.<br>(0 hr)  | 1 a.m. – 6 a.m.<br>(0 hr)   | 0 a.m. – 5 a.m.<br>(+2 hr) | 3 a.m. – 8 a.m.<br>(0 hr)   | 1 a.m. – 6 a.m.<br>(+2 hr)  |
| Autumn    | 1 a.m. – 6 a.m.<br>(+1 hr) | 1 a.m. – 6 a.m.<br>(0 hr)   | 9 p.m. – 2 a.m.<br>(-1 hr) | 5 a.m. – 10 a.m.<br>(+2 hr) | 0 a.m. – 5 a.m.<br>(+1 hr)  |

As a result, most of the seasonal derived *start time windows* differ moderately from the overall derived *start time windows*. However, two exceptions are observed, which are winter at *SNB* and spring at *JFJ*. Therefore, graphical examination was taken in Fig. S1.1 (a) and (b).

For winter time at *SNB*, the seasonal derived *start time window* is with the least standard deviation, but doesn't exhibit the minimal value from the diurnal cycle. For winter, we expect the most representative level of CO<sub>2</sub> to be around the minimal values with relatively small standard deviations. Therefore, the overall derived *start time window* is more suitable to be the ideal *start time window* in this case.

Similar case happens to the spring time at *JFJ*. For spring, the vegetation activities have been already influenced the CO<sub>2</sub> diurnal cycle. The *start time window* in this case is not suitable as the minimal values included. Again, the overall derived *start time window* is more practical.

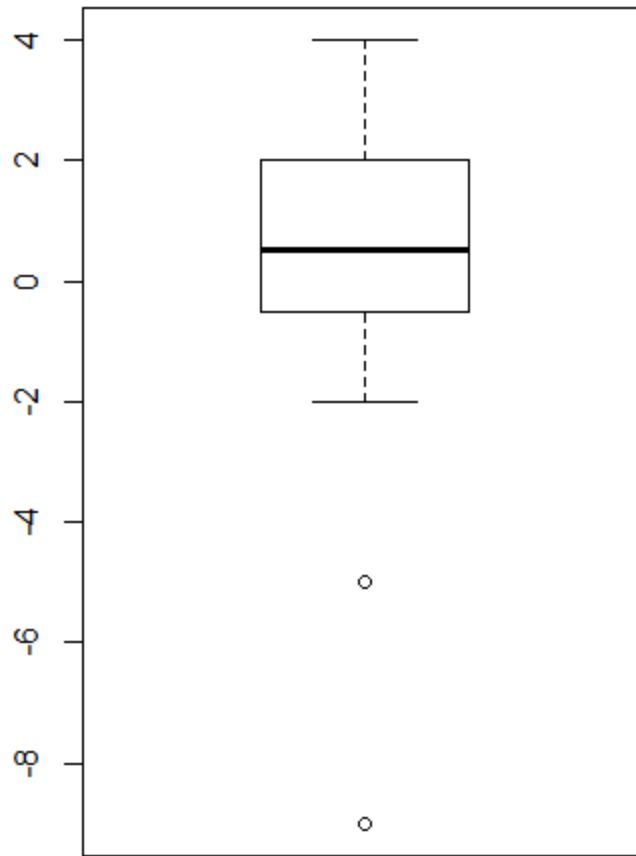

**Figure S1.1 (a):** Boxplot for hourly shifts of seasonal derived *start time windows* from overall derived *start time windows*, corresponding to Table S1.1.

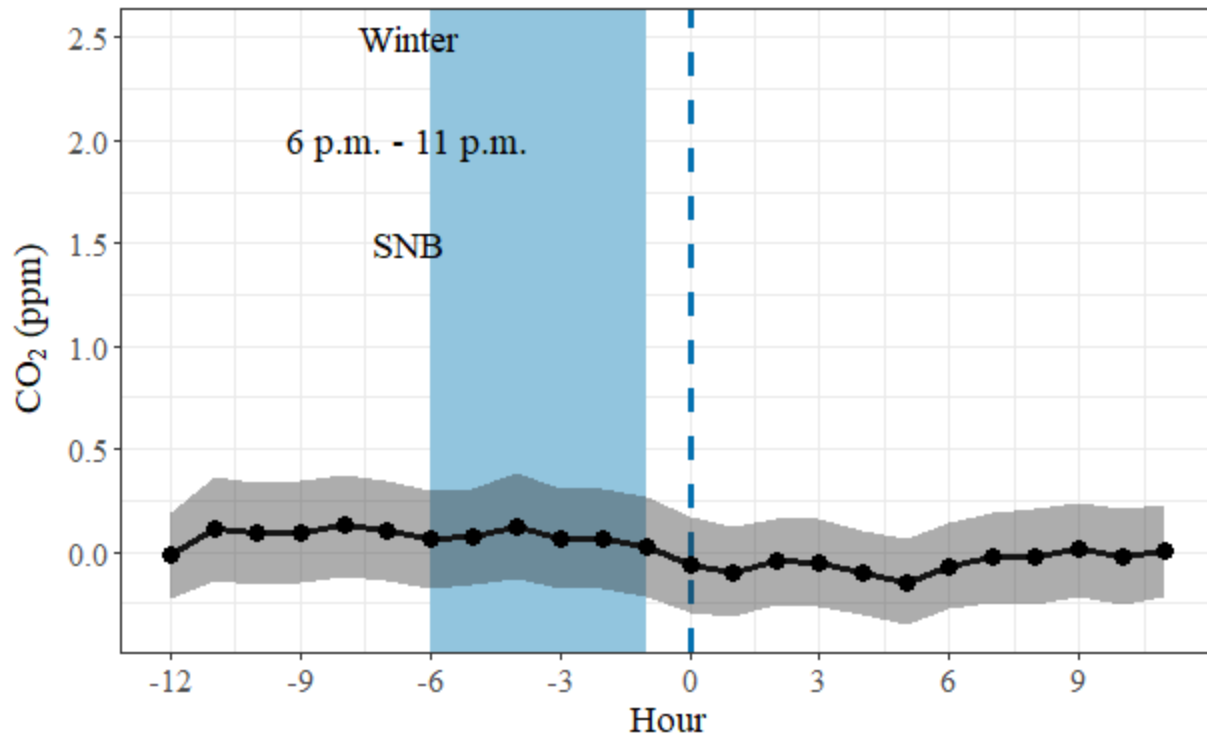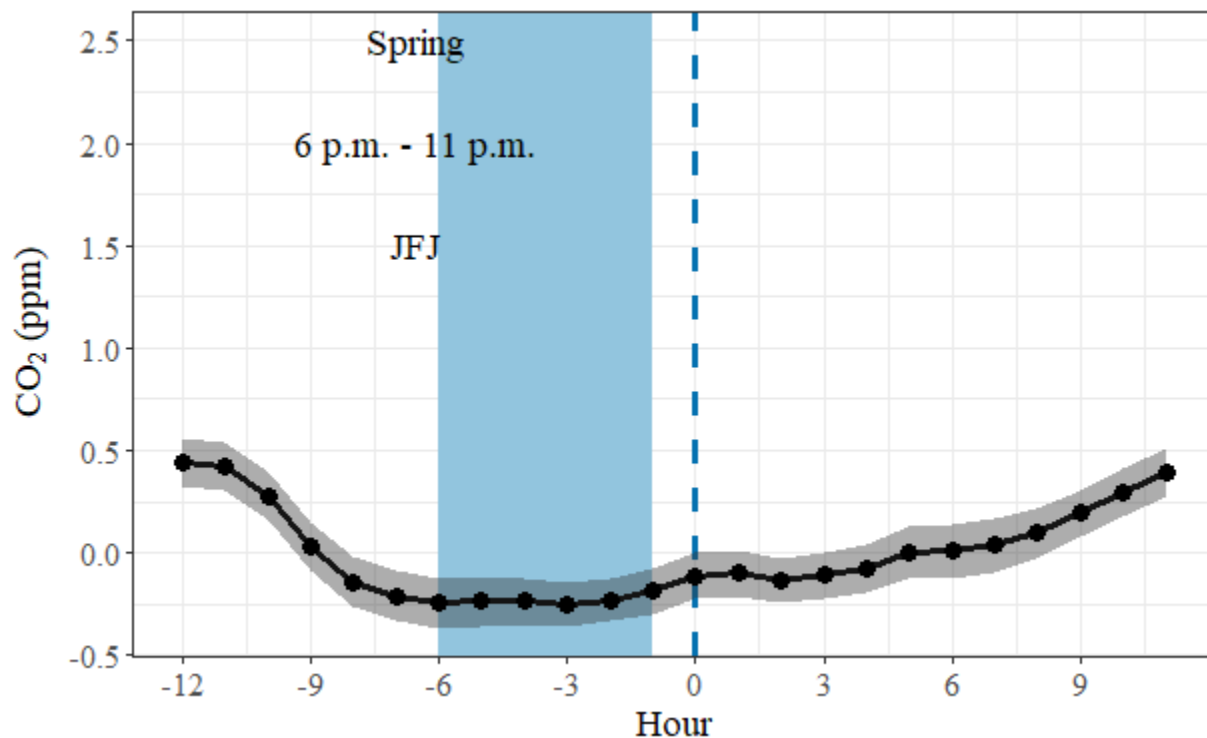

Figure S1.1 (b): Detrended mean diurnal variations of validated CO<sub>2</sub> mole fractions (black) with 95% confidence intervals (grey) for winter time at SNB (upper) and for spring time at JFJ (below). The corresponding seasonal derived *start time windows* are shown both in blue shades and texts.

### S1.2 Standard deviation threshold $s_{i,threshold}$

The threshold of standard deviation determines the degree of variation for the selection time windows. In the study, we applied 0.3 ppm to all the stations for inter-comparison. But it is clear that for low altitude stations like *SSL*, this value may be not appropriate. We tried 1.0 ppm threshold for station *SSL* and resulted in the same *start time window* and a much higher percentage of selected data (26.51% compared with 4.0% in the main text), however with a few irregular spikes observed below.

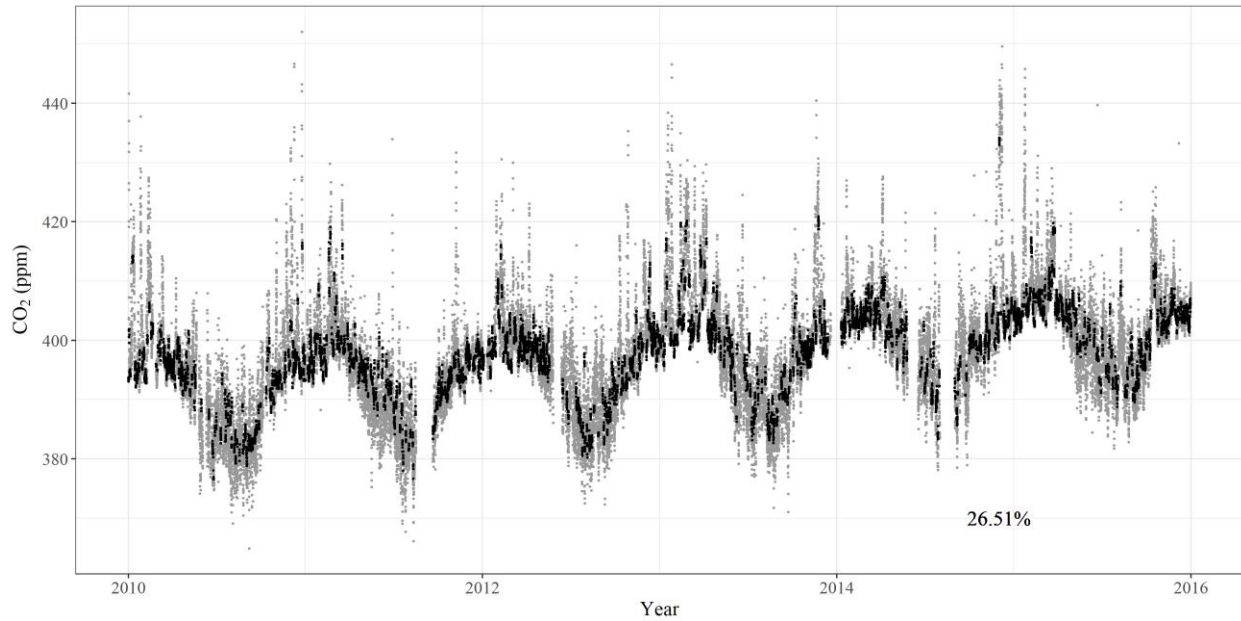

**Figure S1.2: Time series plot of validated CO<sub>2</sub> dataset (grey) and ADVS-selected dataset (black) at *SSL* from 2010 to 2015.**

### S1.3 Time resolution $tr$

Data at station *ZSF* were taken to evaluate the differences in data selection on different time resolution. To compare with the selected result based on hourly averages, we applied ADVS directly to the 30-min validated dataset. The resulting *start time windows* are the same, but the percentages of selected data are significantly different at 95% confidence interval, shown in table below.

**Table S1.3 (a): Percentages of selected data by ADVS applied to ZSF datasets.**

| <b>Time resolution</b> | <b>Percentage of selected data <math>\pm</math> 95% confidence interval</b> |
|------------------------|-----------------------------------------------------------------------------|
| 30-min                 | $13.46 \pm 0.22$                                                            |
| 1-hour                 | $14.76 \pm 0.33$                                                            |

For station *JFJ*, the 10-min validated dataset was available for more detailed comparison. We prepared the ADVS-selected datasets on 10-min, 20-min and 30-min time scale to compare with the hourly selected results. The resulting *start time windows* are again the same. The resulted percentages of selected data show again significant differences (at 95% confidence interval) between each two datasets, shown in table below.

**Table S1.3 (b): Percentages of selected data by ADVS applied to JFJ datasets.**

| <b>Time resolution</b> | <b>Percentage of selected data <math>\pm</math> 95% confidence interval</b> |
|------------------------|-----------------------------------------------------------------------------|
| 10-min                 | $18.73 \pm 0.14$                                                            |
| 20-min                 | $20.02 \pm 0.21$                                                            |
| 30-min                 | $20.75 \pm 0.26$                                                            |
| 1-hour                 | $22.14 \pm 0.37$                                                            |

As a result, these percentages clearly indicate a significantly smaller percentage of selected data with finer time resolution. This can be possibly explained based on the statistical property of ADVS. While ADVS evaluates the standard deviation within a time window, averaged data with larger time intervals show more statistical robustness. For ADVS, it is applicable for datasets with time resolution equal to or finer than one hour.

## S2 Detrended diurnal cycles

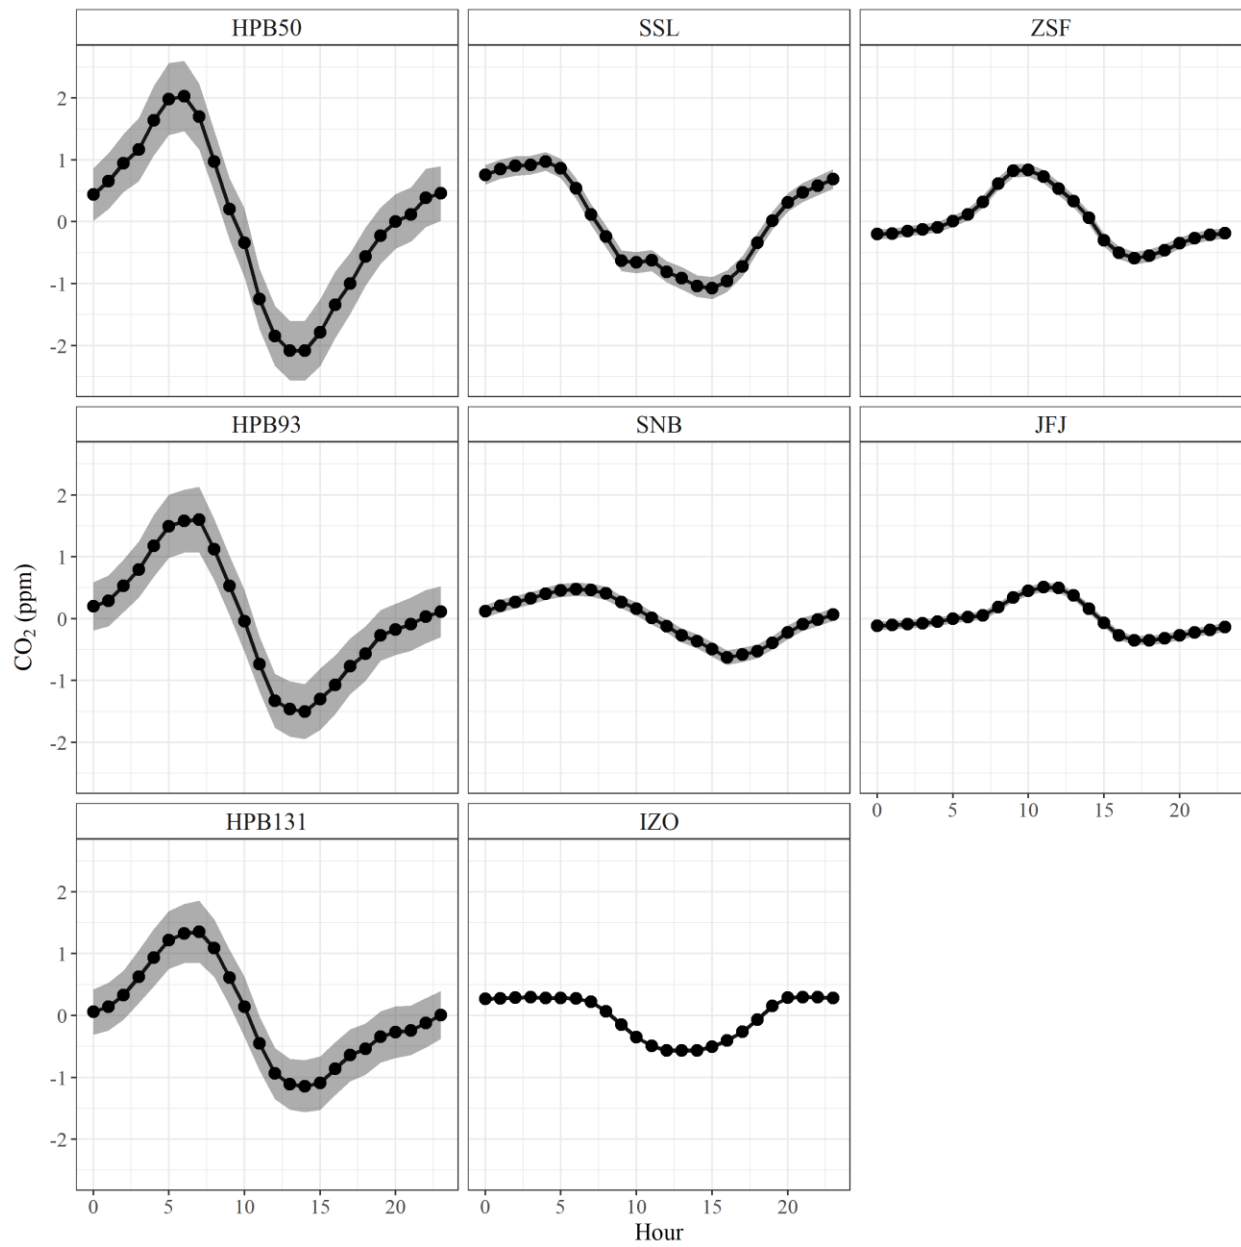

**Figure S2: Detrended mean diurnal variation of validated CO<sub>2</sub> mole fractions (black) with 95% confidence intervals (gray) at six European GAW stations.**

## S3 Percentage of selected data

### S3.1 Linear regression of station altitudes and percentages of selected data

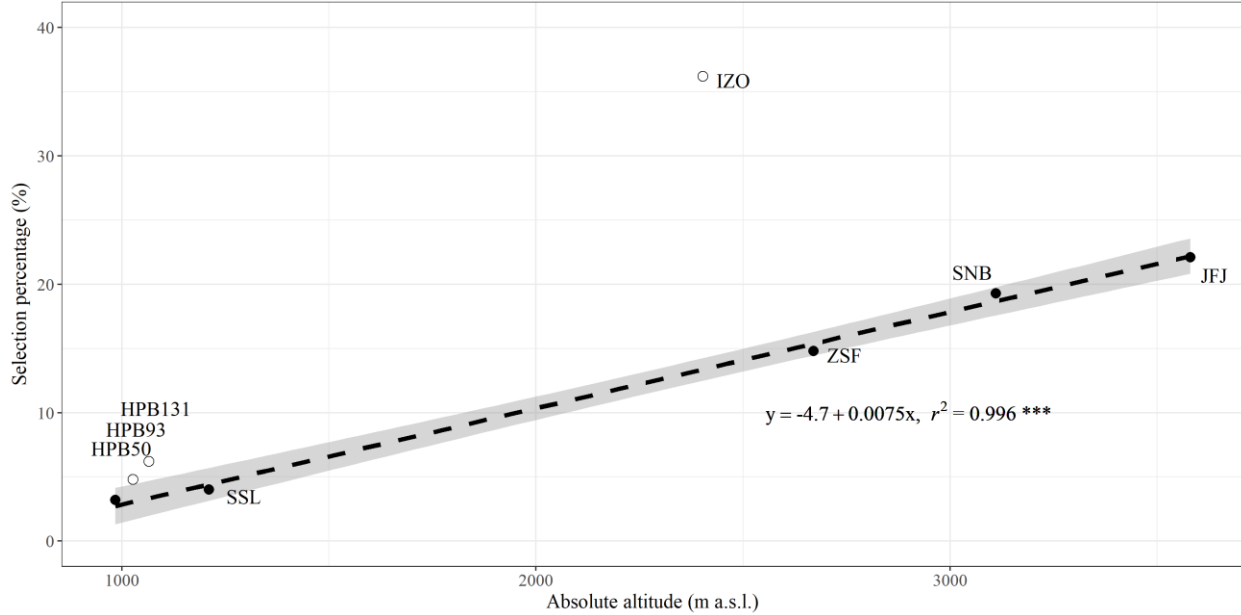

Figure S3.2: Linear regression between the absolute altitudes and the final percentages of selected data by ADVS for all continental sites (excluding *IZO*). For *HPB*, only *HPB50* is chosen as the demonstration sampling height.

### S3.2 Table of percentages of selected data

Table S3.2: List of percentages of selected data (%) during ADVS data selection process ( $\pi_1$  – selected days with valid *start time window* in all days;  $\pi_2$  – selected hours with valid *start time window* in all hourly data;  $\pi_3$  – selected hours after *forward adaptive selection* in all hourly data; ADVS – final percentages of selected data). The bottom shows the linear regression coefficients of stations (*HPB* is represented by *HPB50*; *IZO* is excluded) altitudes and the percentages of selected data at significance level of 0.05 (\*\*\*).

| Station ID                                   | $\pi_1$  | $\pi_2$  | $\pi_3$  | ADVS*    |
|----------------------------------------------|----------|----------|----------|----------|
| <i>HPB50</i>                                 | 15.2     | 2.1      | 2.6      | 3.2      |
| <i>HPB93</i>                                 | 22.7     | 3.2      | 3.9      | 4.8      |
| <i>HPB131</i>                                | 29.6     | 4.3      | 5.2      | 6.2      |
| <i>SSL</i>                                   | 14.3     | 2.6      | 3.2      | 4.0      |
| <i>IZO</i>                                   | 85.2     | 20.0     | 26.1     | 36.2     |
| <i>ZSF</i>                                   | 52.8     | 8.9      | 12.3     | 14.8     |
| <i>SNB</i>                                   | 47.3     | 10.9     | 14.9     | 19.3     |
| <i>JFJ</i>                                   | 69.3     | 12.1     | 17.4     | 22.1     |
| Linear regression coefficient ( $\gamma^2$ ) | 0.941*** | 0.996*** | 0.998*** | 0.996*** |

\*For ADVS, the final percentage of selected data is equivalent to the percentage of selected hours after backward adaptive selection in all hourly data.



### S3.3 Comparison of percentages of selected data among data selection methods

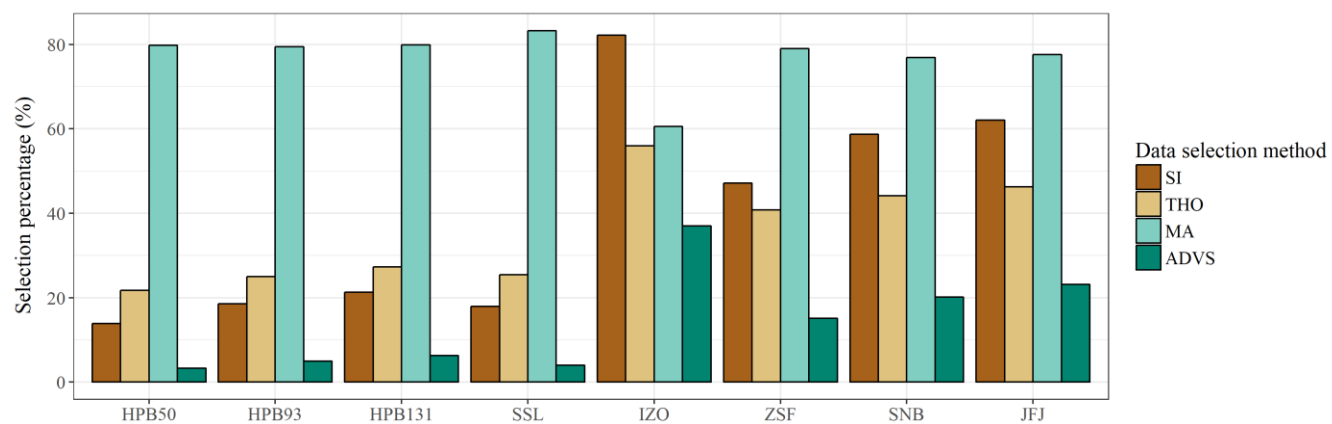

**Figure S3.3: Comparison of the percentages of selected data by four statistical data selection methods applied to validated CO<sub>2</sub> datasets at six GAW stations.**

### S4 Mean monthly variations at *SSL*, *SNB* and *JFJ*

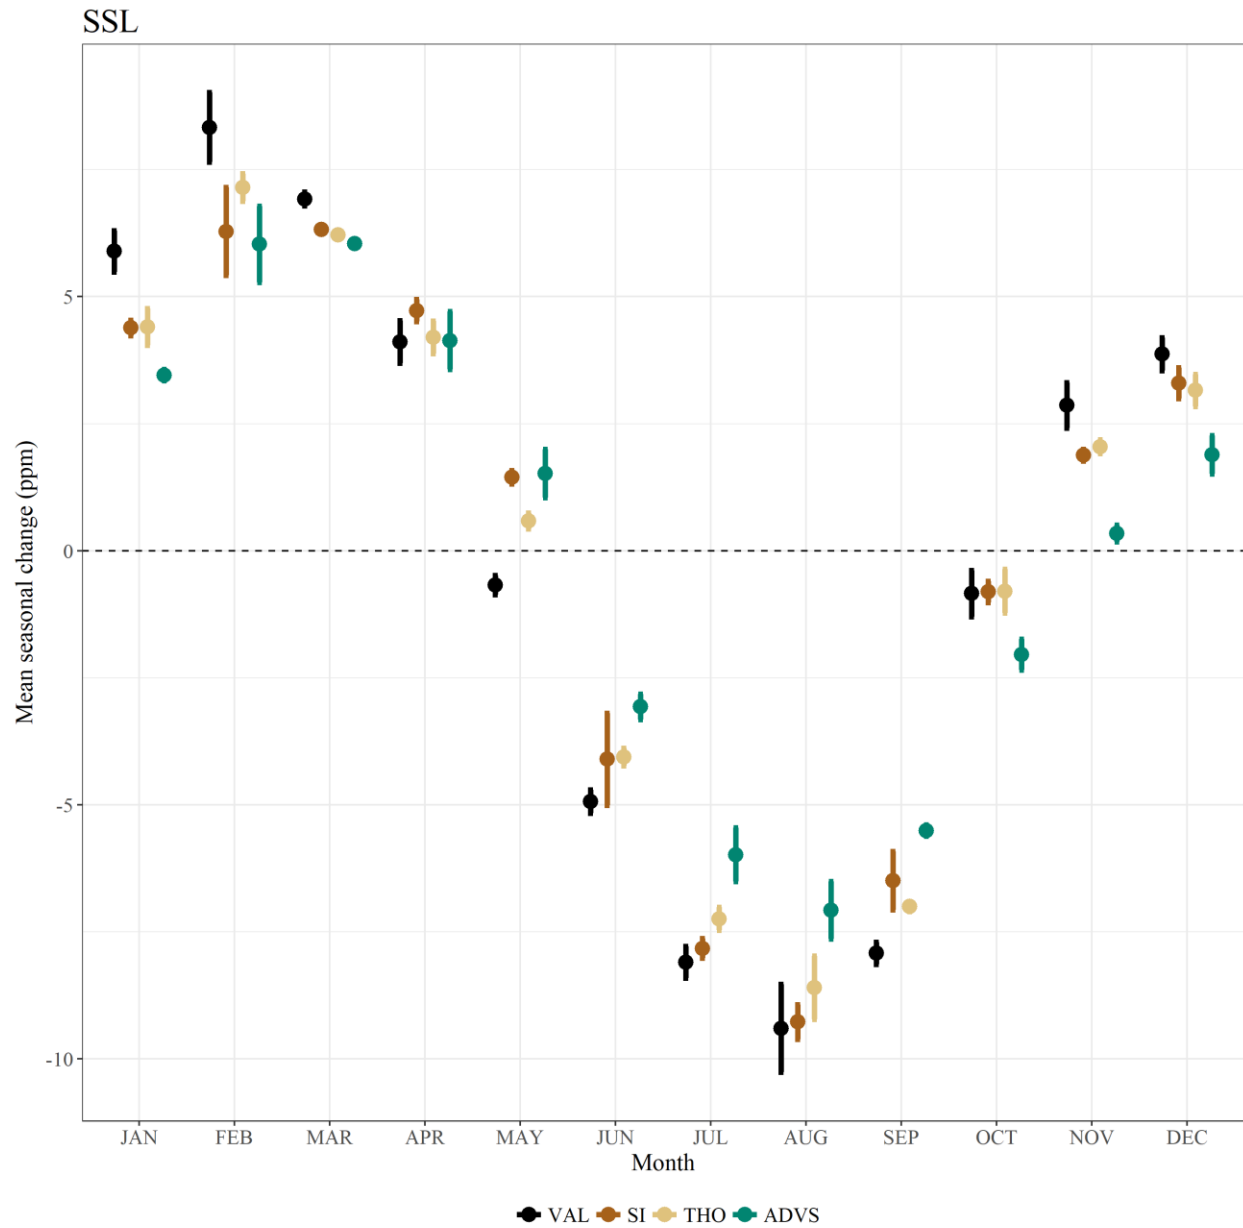

Figure S4.1: Mean monthly variation of the seasonal component decomposed by STL at *SSL* over the whole time period.

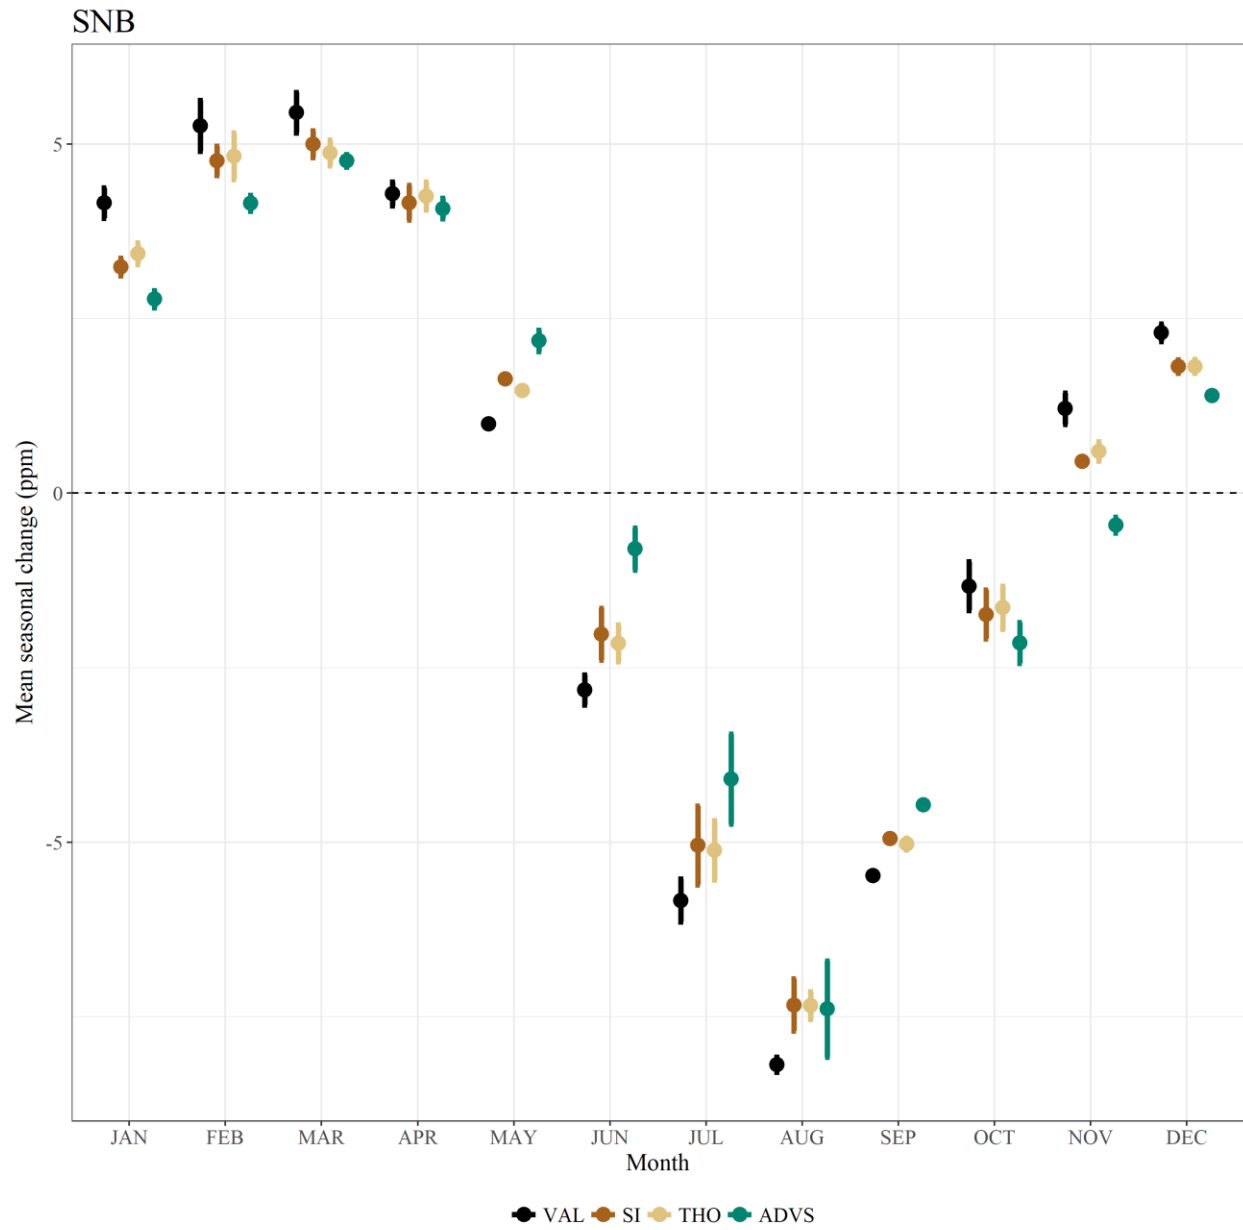

**Figure S4.2: Mean monthly variation of the seasonal component decomposed by STL at *SNB* over the whole time period.**

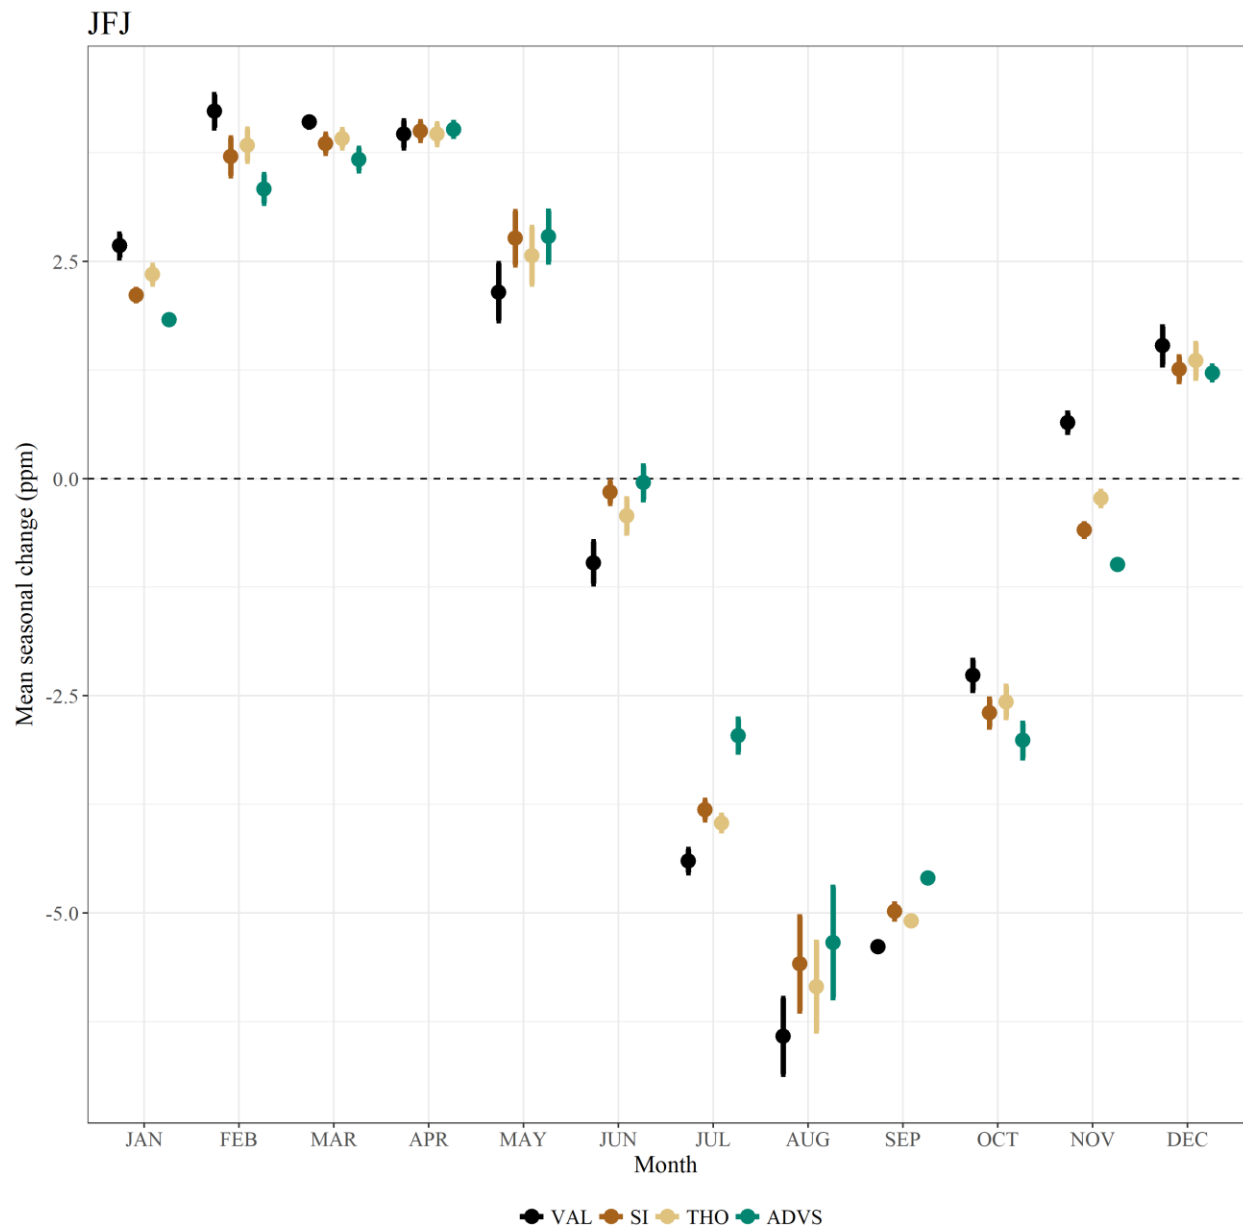

**Figure S4.3: Mean monthly variation of the seasonal component decomposed by STL at *JFJ* over the whole time period.**
